# Supplementary material
Source: publisher site journal article supplement (https://www.dovepress.com/get_supplementary_file.php?f=321764.docx)
Supplement: Supplementary file 1 [file get_supplementary_file.php]

Supplemental Digital Content Table 1. **Legend for the cutoff values used to differentiate healthy from dry eye disease values for the clinical dry eye tests and deep learning model.** Normal or healthy cutoff values and abnormal or dry eye disease cutoff values are included for the deep learning model, physician diagnosis, fluorescein corneal staining (FCS), conjunctival lissamine green staining, tear break-up time (TBUT), Schirmer’s test (ST), and Ocular Surface Disease Index (OSDI). Cutoff values were set before data collection.

| Legend | Corneal fluorescien staining | Conjunctival lissamine green staining | TBUT | Schirmers test | OSDI | Physician Diagnosis | Deep Learning Model |
| --- | --- | --- | --- | --- | --- | --- | --- |
| range | out of 15 | out of 18 | no limit (seconds) | no limit (seconds) | out of 100 | N/A | Out of 180 (images) |
| healthy | ≤3 | ≤3 | >10 | >5 | ≤13 | healthy | ≤90 |
| dry eye | >3 | >3 | ≤10 | ≤5 | >13 | dry eye | >90 |

Supplemental Digital Content Table 2. **Complete raw data for the dry eye disease (DED) group**. Results of the deep learning model, physician diagnosis, fluorescein corneal staining (FCS), conjunctival lissamine green staining, tear break-up time (TBUT), Schirmer’s test (ST), and Ocular Surface Disease Index (OSDI).

| Test Eye | Corneal fluorescien staining | Conjunctival lissamine green staining | TBUT | Schirmers test | OSDI | Physician Diagnosis | Deep Learning Model |
| --- | --- | --- | --- | --- | --- | --- | --- |
| (NEI scale) | (NEI scale) | (sec) | (mm) | (0-100) | (0-180) |
| 1 | 0 | 0 | 17 | 10 | 39.6 | dry eye | 122 |
| 2 | 0 | 0 | 17 | 5 | 20.8 | dry eye | 164 |
| 3 | 0 | 0 | 20 | 9 | 32.5 | dry eye | 175 |
| 4 | 0 | 0 | 7 | 3 | 52.3 | dry eye | 177 |
| 5 | 15 | 14 | 2 | 2 | 18.2 | dry eye | 179 |
| 6 | 0 | 0 | 16 | 1 | 9.1 | dry eye | 172 |
| 7 | 0 | 0 | 7 | 8 | 2.1 | dry eye | 169 |
| 8 | 3 | 4 | 8 | 8 | 24 | dry eye | 73 |
| 9 | 3 | 0 | 7 | 4 | 8.3 | dry eye | 180 |
| 10 | 2 | 0 | 10 | 13 | 0 | dry eye | 135 |
| 11 | 4 | 2 | 12 | 7 | 9.1 | dry eye | 158 |
| 12 | 2 | 2 | 7 | 0 | 22.9 | dry eye | 58 |
| 13 | 0 | 0 | 20 | 8 | 64.6 | dry eye | 168 |
| 14 | 0 | 0 | 15 | 6 | 32.5 | dry eye | 158 |
| 15 | 0 | 0 | 6 | 12 | 52.3 | dry eye | 173 |
| 16 | 7 | 2 | 4 | 20 | 22.7 | dry eye | 113 |
| 17 | 15 | 18 | 6 | 6 | 18.2 | dry eye | 159 |
| 18 | 8 | 4 | 3 | 10 | 2.1 | dry eye | 170 |
| 19 | 5 | 4 | 5 | 4 | 24 | dry eye | 103 |
| 20 | 3 | 0 | 6 | 4 | 8.3 | dry eye | 180 |
| 21 | 5 | 2 | 3 | 4 | 9.1 | dry eye | 167 |
| 22 | 3 | 0 | 12 | 1 | 22.9 | dry eye | 43 |

Supplemental Digital Content Table 3. **Complete raw data for the healthy group**. Results of the deep learning model, physician diagnosis, fluorescein corneal staining (FCS), conjunctival lissamine green staining, tear break-up time (TBUT), Schirmer’s test (ST), and Ocular Surface Disease Index (OSDI).

| Test Eye | Corneal fluorescien staining | Conjunctival lissamine green staining | TBUT | Schirmers test | OSDI | Physician Diagnosis | Deep Learning Model |
| --- | --- | --- | --- | --- | --- | --- | --- |
| (NEI scale) | (NEI scale) | (sec) | (mm) | (0-100) | (0-180) |
| 1 | 0 | 0 | 17 | 15 | 0 | healthy | 4 |
| 2 | 0 | 0 | 20 | 25 | 2.1 | healthy | 28 |
| 3 | 0 | 0 | 13 | 20 | 0 | healthy | 31 |
| 4 | 0 | 0 | 19 | 9 | 2.1 | healthy | 138 |
| 5 | 1 | 0 | 13 | 13 | 0 | healthy | 74 |
| 6 | 0 | 0 | 13 | 10 | 2.1 | healthy | 0 |
| 7 | 0 | 0 | 14 | 9 | 0 | healthy | 0 |
| 8 | 0 | 0 | 15 | 10 | 6.8 | healthy | 0 |
| 9 | 0 | 0 | 18 | 16 | 0 | healthy | 0 |
| 10 | 0 | 0 | 20 | 28 | 2.1 | healthy | 26 |
| 11 | 1 | 0 | 17 | 20 | 0 | healthy | 138 |
| 12 | 0 | 0 | 16 | 6 | 4.5 | healthy | 22 |
| 13 | 0 | 0 | 11 | 13 | 0 | healthy | 125 |
| 14 | 2 | 0 | 11 | 6 | 6.8 | healthy | 39 |
| 15 | 0 | 0 | 11 | 10 | 2.1 | healthy | 0 |
| 16 | 0 | 0 | 12 | 15 | 0 | healthy | 0 |
| 17 | 0 | 0 | 16 | 9 | 6.8 | healthy | 0 |

Supplemental Digital Content Table 4. **Complete analysis of the comparison between the deep learning model and each of the clinical dry eye disease tests.** Statistical significance differences between the deep learning model and corneal fluorescein staining, conjunctival lissamine green staining, tear break-up time (TBUT), Schirmer’s test, and Ocular Surface Disease Index (OSDI), using the masked ophthalmologist diagnoses as the gold standard. The deep learning model agreed with the ophthalmologist significantly more than the corneal fluorescein staining, conjunctival lissamine green staining, and the Schirmers test (P < 0.05). There was no statistical significance between the deep learning model and the OSDI and TBUT.

| Clinical dry eye test | Analysis |
| --- | --- |
| Corneal fluorescein staining | Of 22 DED eyes, the deep learning model and corneal fluorescein staining correctly agreed with the ophthalmologist on 7 eyes (31.82%), while the deep learning model was correct for 12 eyes (54.54%) when corneal fluorescein staining was incorrect and corneal fluorescein staining was correct for 0 eyes (0%) when the deep learning model was incorrect. This difference was highly statistically significant (*P* < 0.01). |
| Corneal lissamine green staining | Of 22 DED eyes, the deep learning model and corneal lissamine green staining correctly agreed with the ophthalmologist on 4 eyes (18.18%), while the deep learning model was correct for 15 eyes (68.18%) when corneal lissamine green staining was incorrect and corneal lissamine green staining was correct for 1 eyes (4.55%) when the deep learning model was incorrect. This difference was highly statistically significant (*P* < 0.01). |
| Tear breakup time (TBUT) | Of 22 DED eyes, the deep learning model and TBUT correctly agreed with the ophthalmologist on 12 eyes (54.55%), while the deep learning model was correct for 7 eyes (31.82%) when TBUT was incorrect and TBUT was correct for 2 eyes (9.09%) when the deep learning model was incorrect. This difference was not statistically significant (*P* = 0.1824). |
| Schirmers test | Of 22 DED eyes, the deep learning model and Schirmers test correctly agreed with the ophthalmologist on 8 eyes (36.36%), while the deep learning model was correct for 11 eyes (50%) when Schirmers test was incorrect and Schirmers test was correct for 2 eyes (9.09%) when the deep learning model was incorrect. This difference was statistically significant (*P* < 0.05). |
| Ocular Surface Disease Index (OSDI) | Of 22 DED eyes, the deep learning model and OSDI correctly agreed with the ophthalmologist on 11 eyes (50%), while the deep learning model was correct for 8 eyes (36.36%) when OSDI was incorrect and OSDI was correct for 3 eyes (13.64%) when the deep learning model was incorrect. This difference was not statistically significant (*P* = 0.2278). |
